# Supplementary material
Source: PubMed Central journal article supplement (PMC3540743)
Supplement: NIHMS32538-supplement-supplemental_figures.pdf [file NIHMS32538-supplement-supplemental_figures.pdf]

**Supplemental figure 1. B cell development is intact in the absence of p110 $\beta$  and p110 $\delta$  activities**

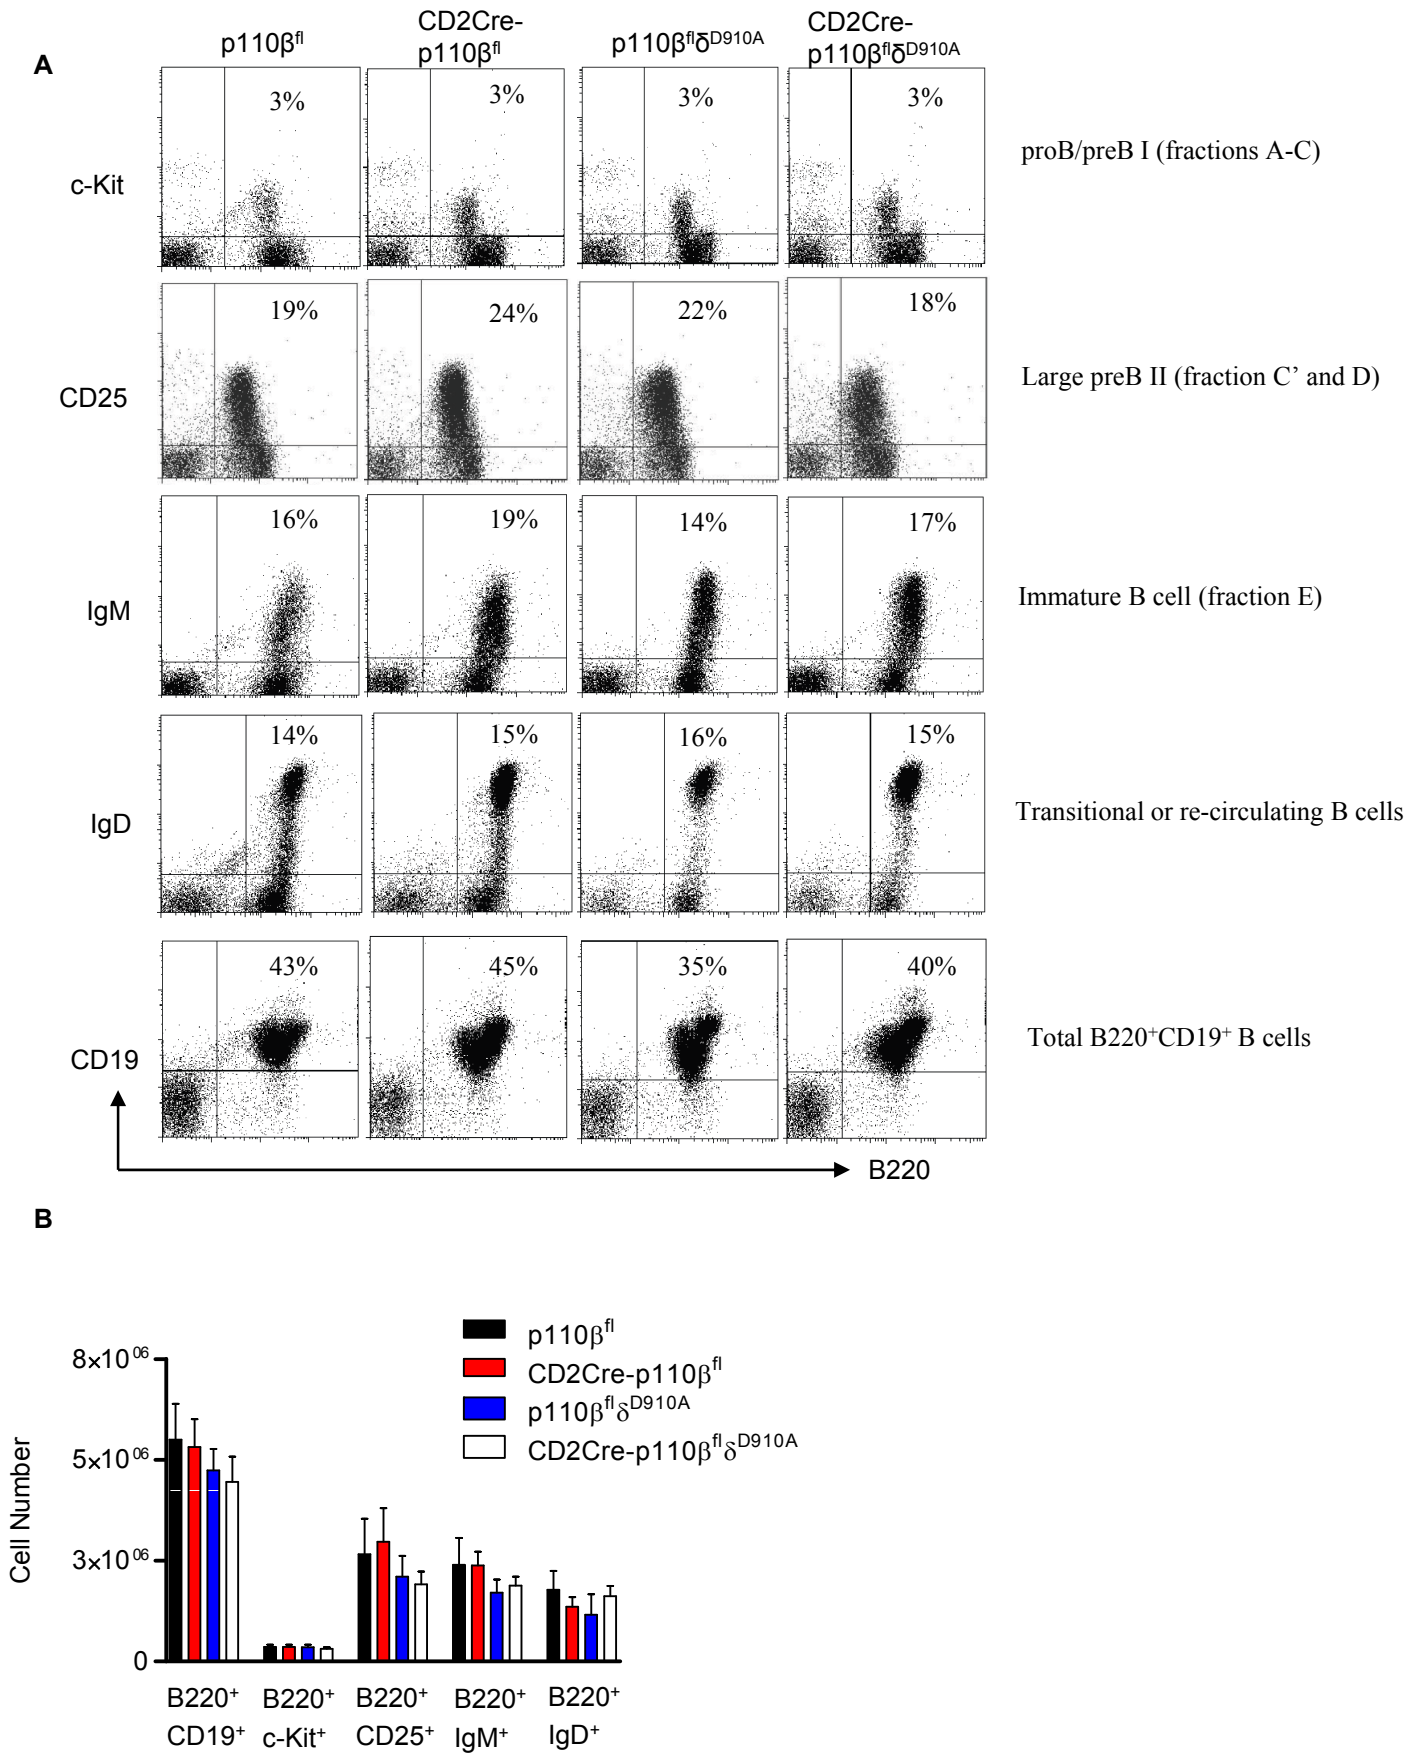

A. FACS plots of lymphocytes from the bone marrow. The percentages in each quadrant or gate are averages. p110 $\beta^{\text{fl}}$  (n=6), CD2Cre-p110 $\beta^{\text{fl}}$  (n=8), p110 $\beta^{\text{fl}}\delta^{\text{D910A}}$  (n=5), CD2Cre-p110 $\beta^{\text{fl}}\delta^{\text{D910A}}$  (n=13).

B. Total number of each B cell subset from two femurs (+/- SEM).

Supplemental figure 2. Deficiency in p110 $\beta$  does not affect B cell maturation in the spleen.

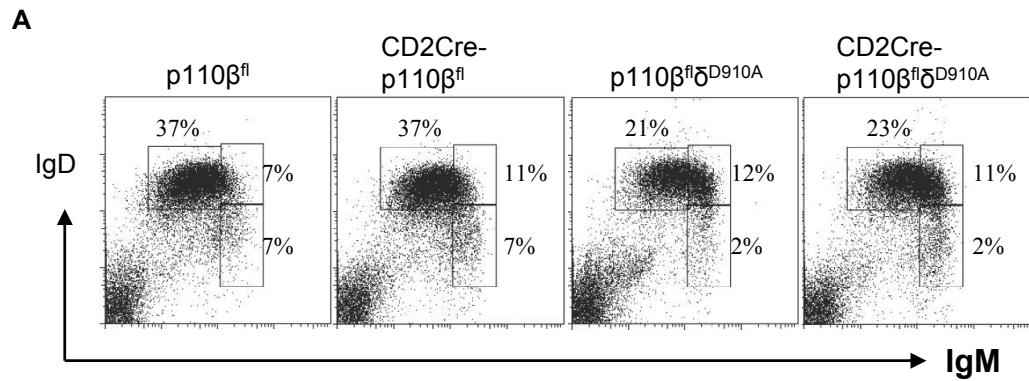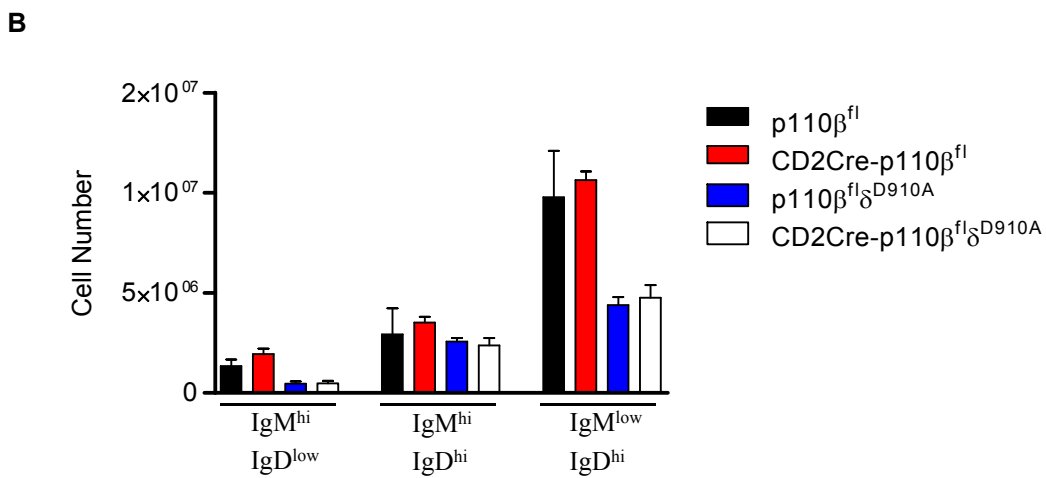

A. Splens cells from p110 $\beta^{fl}$  (n=11), CD2Cre-p110 $\beta^{fl}$  (n=6), p110 $\beta^{fl}\Delta^{D910A}$  (n=11), CD2Cre-p110 $\beta^{fl}\Delta^{D910A}$  (n=11) were analyzed by FACS using the indicated markers.

B. Numbers of immature (IgM<sup>hi</sup>IgD<sup>low</sup> or IgM<sup>hi</sup>IgD<sup>hi</sup>) and mature IgM<sup>low</sup>IgD<sup>hi</sup> B cells (+/- SEM).
